# Supplementary material
Source: HighWire-hosted journal article supplement (https://jnm.snmjournals.org/highwire/filestream/103477/field_highwire_adjunct_files/0/259036_Supplemental_Data.pdf)
Supplement: 259036_Supplemental_Data.pdf [file 259036_Supplemental_Data.pdf]

## 1 HLE BiTE molecule conjugation, labeling and characterization

2  
3 A cell-based assay served to evaluate binding of the MSLN HLE BiTE molecule to  
4 its targets. Concentrations from  $10^{-3}$  nM to  $10^3$  nM of the MSLN HLE BiTE were incubated  
5 for 1 hour at 4 °C with  $2.5 \times 10^5$  murine T-cells or 4T1 cells. Murine T-cells were obtained  
6 by negative selection with the Pan T-Cell Isolation Kit II, mouse (Miltenyi Biotec). After  
7 incubation for 1 hour at 4 °C with the MSLN HLE BiTE, cells were washed and incubated  
8 with a secondary antibody, either goat anti-mouse IgG-APC (Jackson ImmunoResearch)  
9 or goat anti-mouse IgG - AF647 (Invitrogen). Cells were gated for live cells with fixable  
10 viability dye eFluor 506 (Affymetrix, eBioscience). Data was acquired by BD LSRFortessa  
11 Flow Cytometer (BD Biosciences) and analyzed with FlowJo software (FlowJo v10).  
12 Mesothelin expression was quantified on 4T1 and OVCAR8 cells with a standard receptor  
13 quantitation QIFIKIT® assay (Dako).

14 Specific cytotoxicity of MSLN HLE BiTE and the control HLE BiTE molecule was  
15 studied adding concentrations of  $10^{-3}$  pM to  $10^4$  pM of either molecule to mouse T-cells  
16 and  $10^4$  4T1 or B16F10 tumor cells in a ratio of 10:1. The melanoma cell line B16F10  
17 (ATCC) was cultured in DMEM medium (Biochrom) containing 10% fetal calf serum  
18 (Invitrogen). Read-outs were propidium iodide-positive tumor cells for cytotoxicity and  
19 CD69-positive T-cells for T-cell activation. Data was acquired by FACS Canto II (BD  
20 Biosciences) and sigmoidal curves were generated using GraphPad Prism 7.

21 Both HLE BiTE molecules were conjugated as previously described (13). In short,  
22 tetrafluorophenol-*N*-succinyl-desferrioxamine-Fe (TFP-*N*-suc-DFO-Fe; ABX) was  
23 conjugated to the MSLN HLE BiTE and the control HLE BiTE. Conjugation efficiency and  
24 protein purity were evaluated by size exclusion ultra-performance liquid chromatography  
25 (SE-UPLC, Waters) with a dual-wavelength absorbance detector (280 nm versus 430

1 nm). A TSKgel G3000SW<sub>XL</sub> column (Tosoh) and phosphate-buffered saline (140 mmol/L  
2 NaCl, 9 mmol/L Na<sub>2</sub>HPO<sub>4</sub>, 1.3 mmol/L NaH<sub>2</sub>PO<sub>4</sub>; pH 7.4) as mobile phase were used. The  
3 conjugate with a concentration of 1 mg/mL was stored at -80 °C. Stability by assessing  
4 the formation of low and high molecular weight species was determined by SE-UPLC  
5 analysis. Maintained immunoreactivity for both arms was studied by functional cell-based  
6 assays: cytotoxicity and T-cell activation. Concentrations of 10<sup>-3</sup> ng/mL to 10<sup>3</sup> ng/mL  
7 conjugated or unmodified HLE BiTE molecules were added to murine T-cells and 10<sup>4</sup> 4T1  
8 tumor cells in a ratio of 10:1. Read-outs were propidium iodide-positive tumor cells for  
9 cytotoxicity and CD69-positive T-cells for T-cell activation. Data was acquired by FACS  
10 Canto II.

11 The conjugated HLE BiTE molecules were labeled with <sup>89</sup>Zr, as described  
12 previously (25). Radiochemical purity was evaluated by a trichloroacetic acid precipitation  
13 assay and SE-UPLC analysis. No visible particles were detected. Conjugated MSLN HLE  
14 BiTE and conjugated control HLE BiTE were labeled with <sup>89</sup>Zr with >95% radiochemical  
15 purity at a specific activity of 400 - 500 MBq/mg.

16 A radiolabeled protein dose of 10 µg <sup>89</sup>Zr-MSLN HLE BiTE or 10 µg <sup>89</sup>Zr-control  
17 HLE BiTE was prepared for each dose group. A cold protein dose of the respective  
18 unlabeled parental HLE BiTE was added to the hot dose to reach a final protein dose of  
19 50 µg or 200 µg.

20

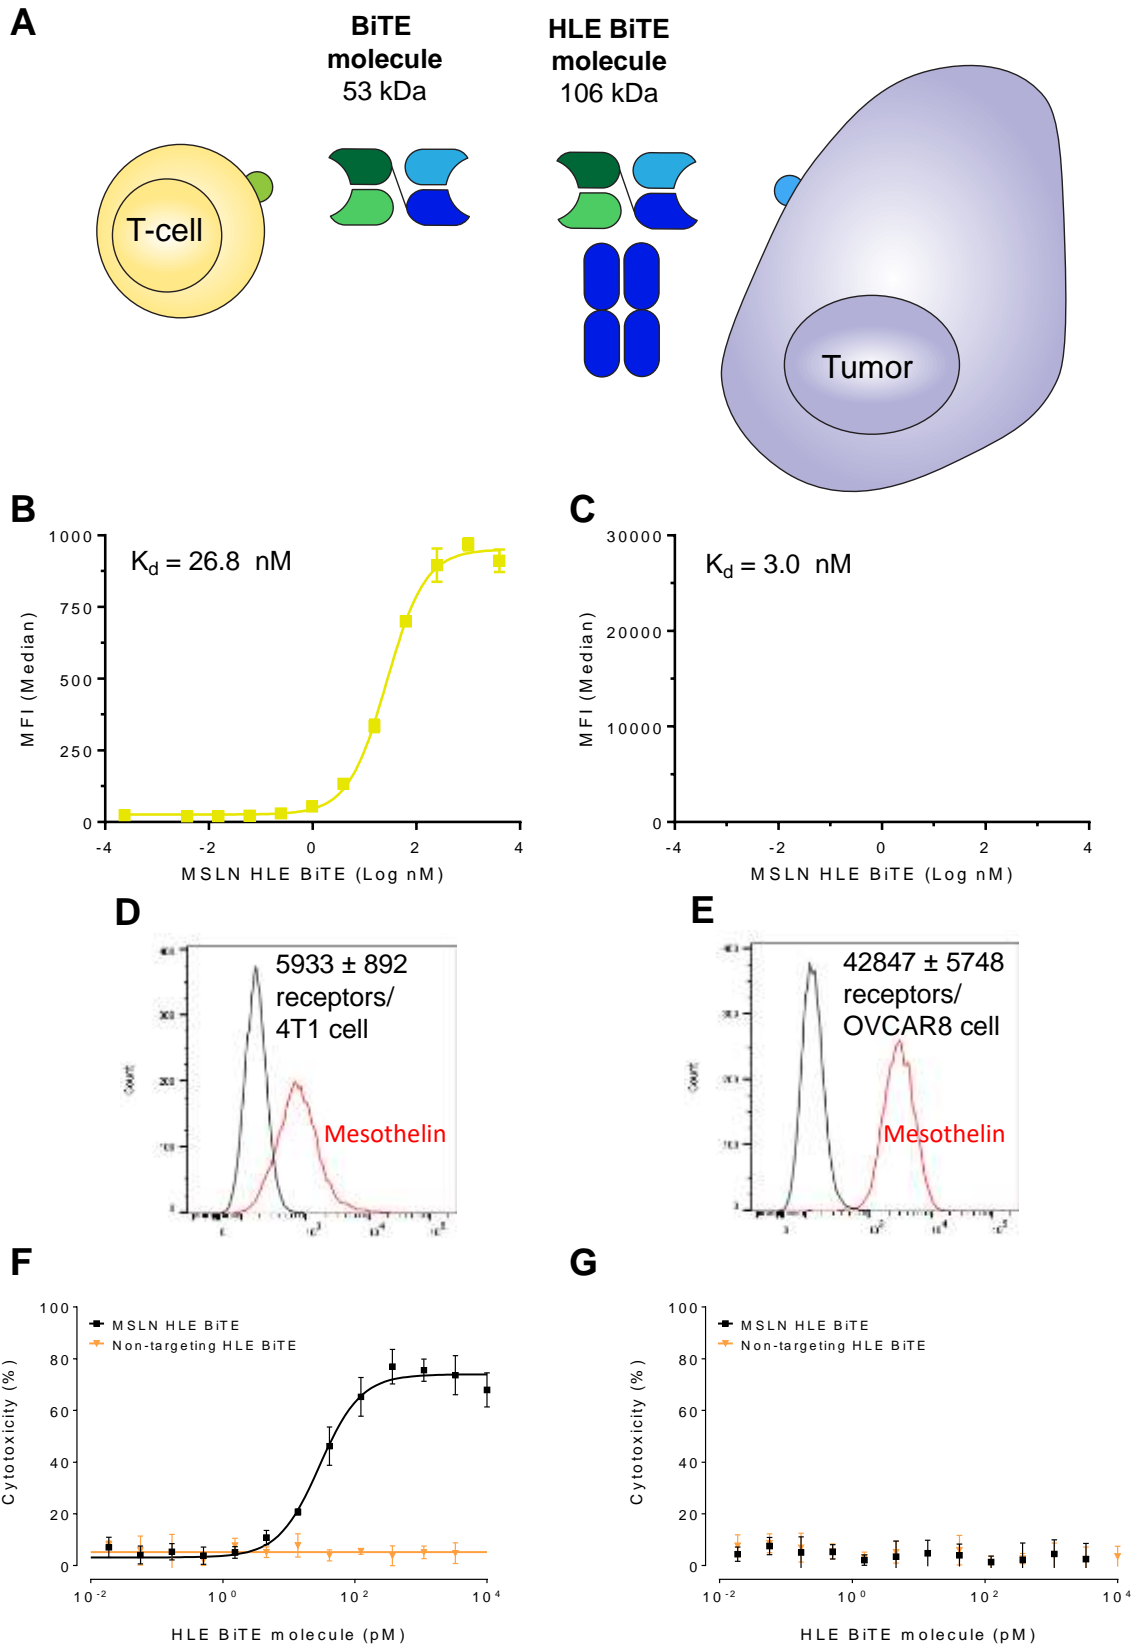

1 **Supplemental Figure 1.** A, Simplified schematic overview of a canonical BiTE and HLE  
2 BiTE molecule. Both bind to T-cell and tumor, but the HLE BiTE has an Fc-domain  
3 increasing its size. B, Binding assay of the MSLN HLE BiTE with CD3 on murine T-cells.  
4 C, Binding assay of the MSLN HLE BiTE with mesothelin on 4T1 cells. Data is presented  
5 as mean  $\pm$  standard deviation. D and E, Mesothelin expression (red) on 4T1 cells (D) and  
6 on OVCAR8 cells (E) expressed as mean  $\pm$  standard deviation (n = 2). F and G,  
7 cytotoxicity assay with T-cells: 4T1-tumor cells (F) and B16F10 (G, mesothelin negative)  
8 incubated at a ratio of 10:1.

9

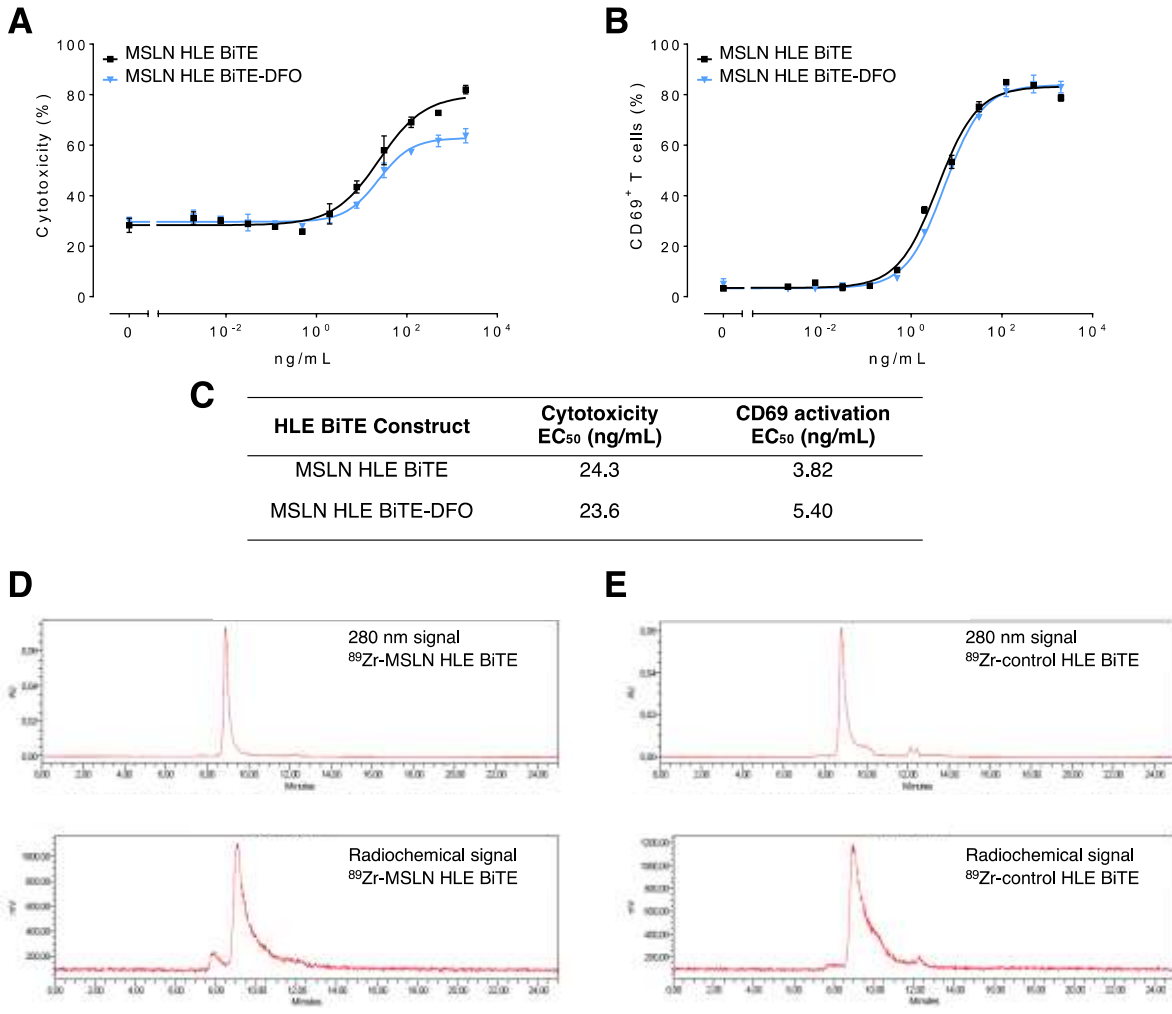

1  
 2 **Supplemental Figure 2.** Characterization of <sup>89</sup>Zr-HLE BiTE. Functionality assessed by  
 3 cell-based assays with T-cells: 4T1-tumor cells incubated at a ratio of 10:1. A, Cytotoxicity  
 4 assay. B, T-cell activation by CD69 expression. Data is presented as mean ± standard  
 5 deviation. C, Quantification of sigmoidal curves of A and B. D, UPLC protein signal (280  
 6 nm) and radiochemical signal of <sup>89</sup>Zr-MSLN HLE BiTE. E, UPLC protein signal (280 nm)  
 7 and radiochemical signal of <sup>89</sup>Zr-control HLE BiTE.

8

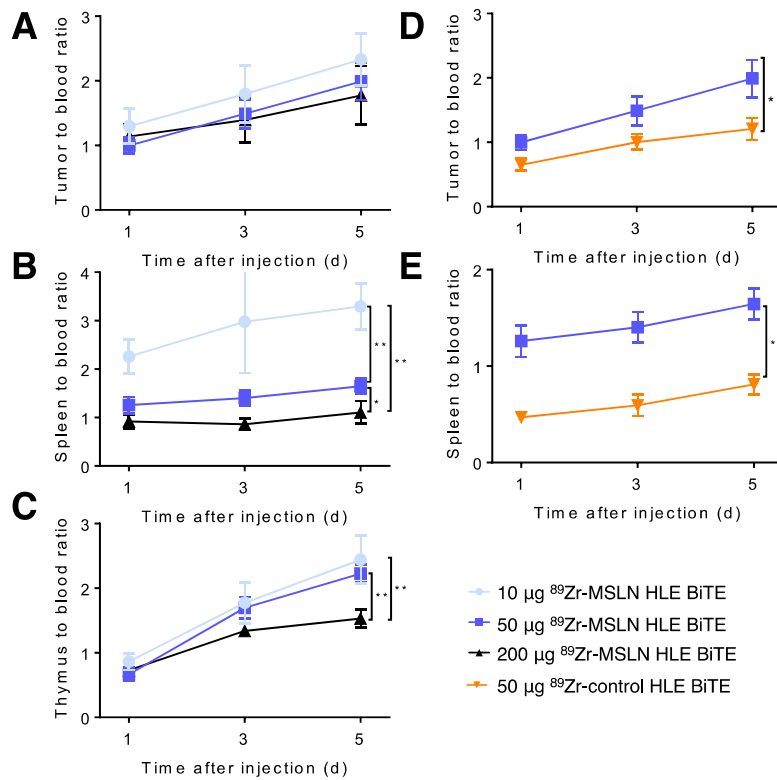

1  
 2 **Supplemental Figure 3.** Organ-to-blood ratios of 10, 50 or 200 µg <sup>89</sup>Zr-MSLN HLE A,  
 3 Tumor. B, Spleen. C, Thymus. Organ-to-blood ratios of 50 µg <sup>89</sup>Zr-MSLN HLE BiTE  
 4 compared with 50 µg <sup>89</sup>Zr-control HLE BiTE D, Tumor. E, Spleen.

5

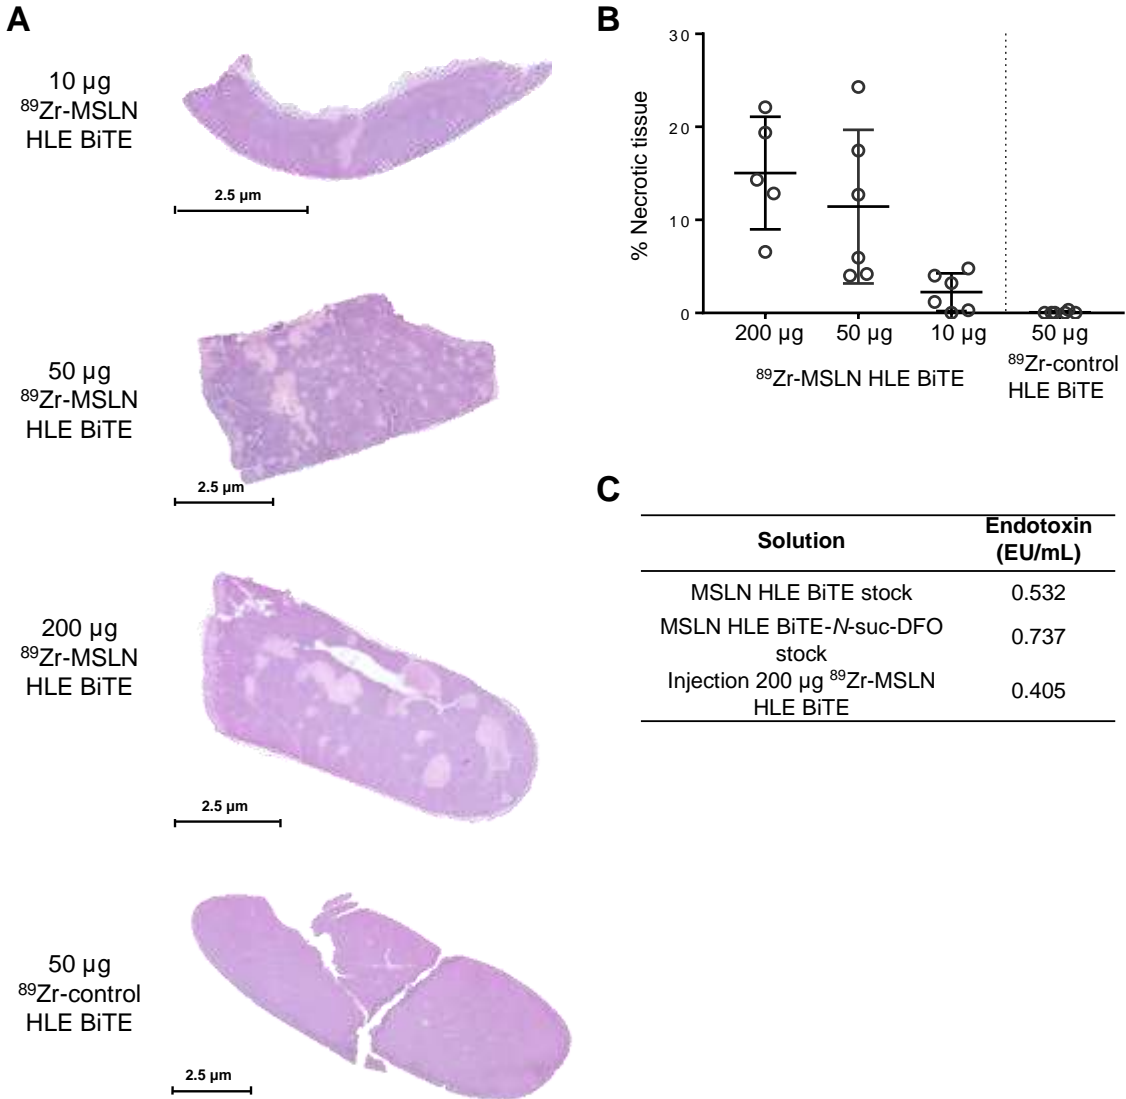

1

2 **Supplemental Figure 4.** Analysis of the liver of 4T1-tumor bearing mice. A,

3 Representative H&E stainings from the different tracer dose groups. B, Necrotic area of

4 liver tissue expressed as a percentage of the area of the entire H&E stained slice. Data is

5 presented as mean ± standard deviation. C, Endotoxin values measured by a limulus

6 amebocyte lysate assay.

7

**A**

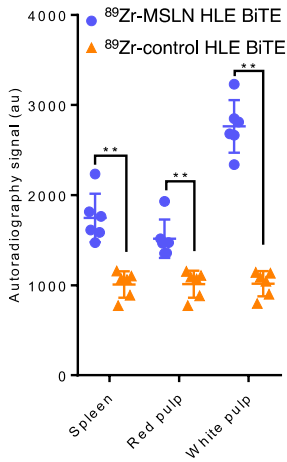

1

2 **Supplemental Figure 5.** Red and white pulp quantified from autoradiography data from

3 Figure 5A, normalized for injected activity. Data expressed as arbitrary units (au)

4 presented as mean  $\pm$  standard deviation; \*:  $P \leq 0.05$ , \*\*:  $P \leq 0.01$ .

5



<sup>89</sup>Zr-MSLN HLE BiTE

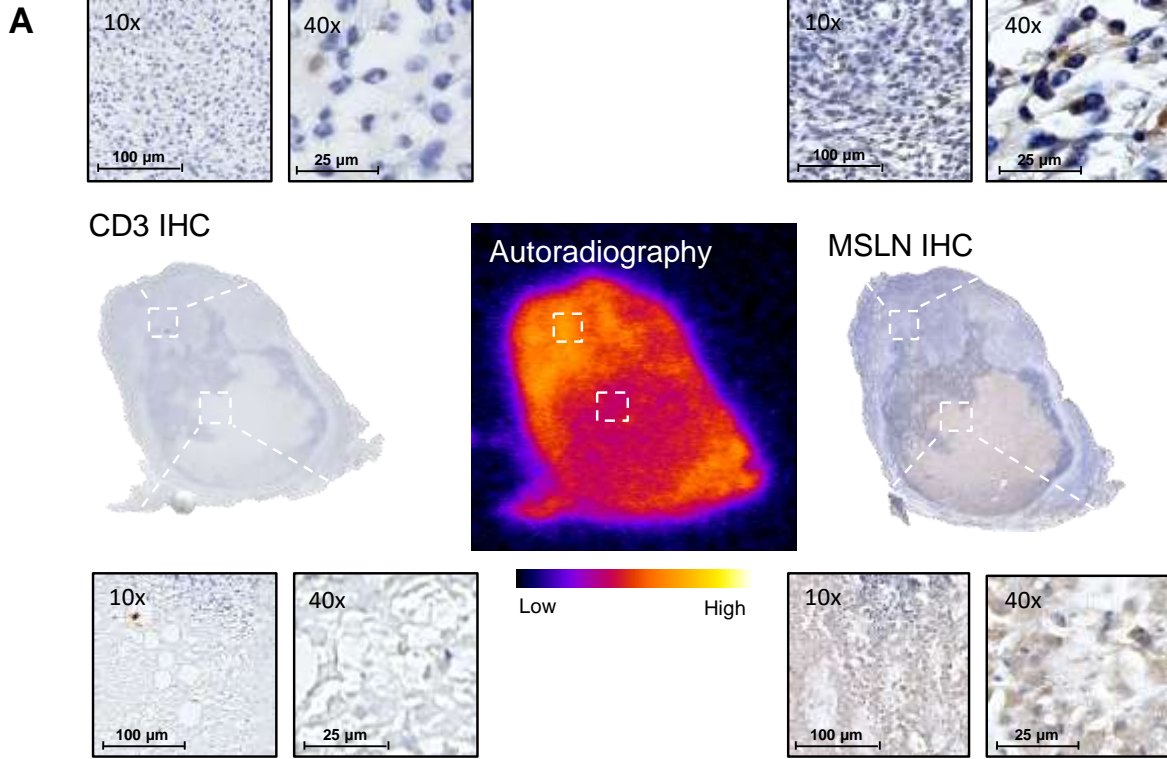

<sup>89</sup>Zr-control HLE BiTE

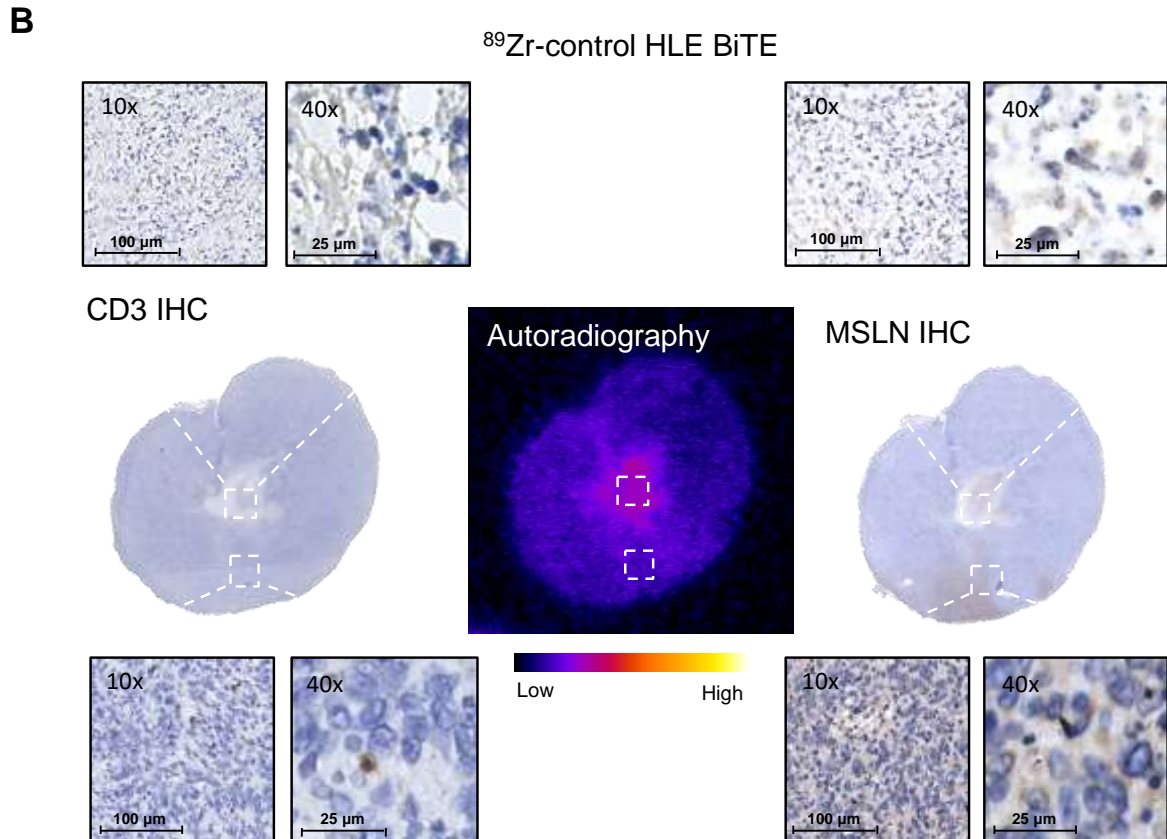

1 **Supplemental Figure 6.** Magnifications from Figure 5A and Figure 5B, *Ex vivo* analysis  
2 of spleen and tumor tissue (4T1) 5 days after injection of 50 µg <sup>89</sup>Zr-MSLN HLE BiTE or  
3 50 µg <sup>89</sup>Zr-control HLE BiTE. Left side, CD3 IHC. Right side, Mesothelin IHC.

4

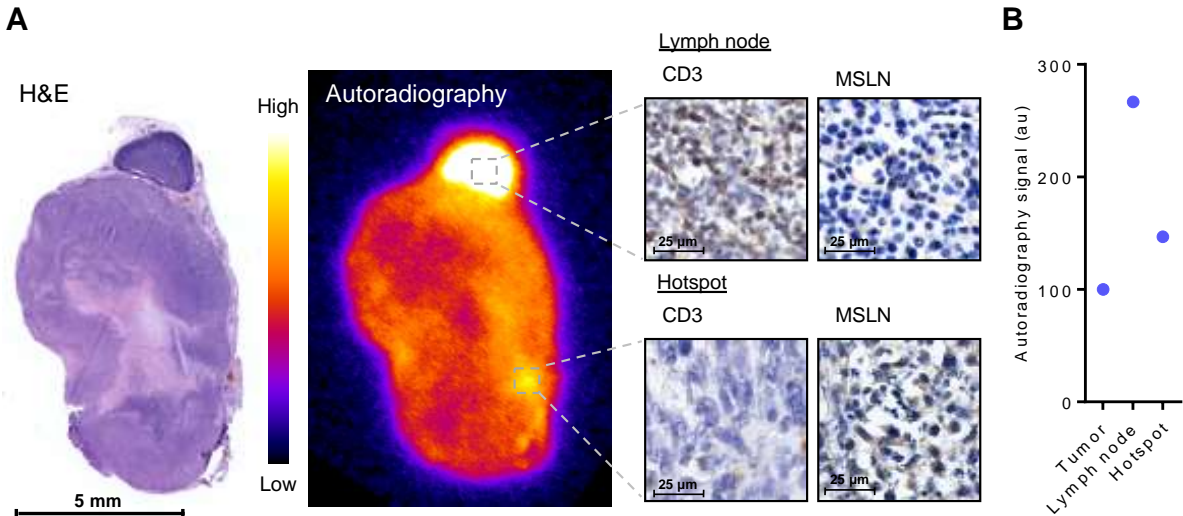

1

2 **Supplemental Figure 7.** *Ex vivo* microscopic analysis of tumor tissue with adjacent lymph

3 node 5 days after injection of 50  $\mu$ g  $^{89}\text{Zr}$ -MSLN HLE BiTE. A, From left to right, hematoxylin

4 and eosin (H&E) staining and corresponding autoradiography. Next,

5 immunohistochemistry (IHC) on CD3 and mesothelin (MSLN) expression. B, Quantified

6 autoradiography data showing higher signal in regions of interest in lymph node than in

7 the tumor and tumor hotspot. Data expressed as arbitrary units (au).

8

1 **Supplemental Table 1.** *Ex vivo* biodistribution data of the three dose groups 5 days  
 2 after <sup>89</sup>Zr-MSNL HLE BiTE tracer injection in 4T1-tumor bearing syngeneic mice.

| Tissue         | 10 µg <sup>89</sup> Zr-MSLN HLE BiTE | 50 µg <sup>89</sup> Zr-MSLN HLE BiTE | 200 µg <sup>89</sup> Zr-MSLN HLE BiTE | ANOVA/<br>Kruskal-<br>Wallis <i>P</i> |
|----------------|--------------------------------------|--------------------------------------|---------------------------------------|---------------------------------------|
| Blood          | 2.72 (2.49 to 4.12)                  | 4.56 (4.17 to 5.83)                  | 5.51 (4.66 to 6.06)                   | 0.013                                 |
| Plasma         | 4.68 (4.68 to 5.18)                  | 7.96 (7.56 to 8.21)                  | 10.13 (8.55 to 12.05)                 | < 0.001                               |
| Heart          | 2.25 (2.07 to 2.50)                  | 3.73 (3.34 to 3.96)                  | 2.59 (2.40 to 2.95)                   | < 0.001                               |
| Lung           | 7.47 (4.90 to 9.31)                  | 10.11 (8.78 to 12.28)                | 7.35 (5.43 to 8.31)                   | 0.030                                 |
| Liver          | 9.16 (8.06 to 9.45)                  | 7.77 (6.92 to 8.28)                  | 5.92 (4.62 to 7.86)                   | 0.005                                 |
| Kidney         | 6.94 (6.52 to 7.11)                  | 7.80 (6.94 to 8.21)                  | 7.09 (6.28 to 7.69)                   | ns                                    |
| Pancreas       | 2.58 (1.81 to 2.93)                  | 2.88 (2.30 to 3.65)                  | 2.35 (1.92 to 2.59)                   | ns                                    |
| Spleen         | 10.12 (9.53 to 12.71)                | 8.83 (5.95 to 12.17)                 | 4.46 (3.85 to 6.75)                   | 0.003                                 |
| Thymus         | 28.95 (19.88 to 34.20)               | 40.78 (36.15 to 65.11)               | 28.49 (17.97 to 49.90)                | ns                                    |
| Mesenteric LNs | 31.97 (21.16 to 39.89)               | 22.57 (20.58 to 24.67)               | 12.03 (10.30 to 12.67)                | < 0.001                               |
| Stomach        | 1.39 (0.91 to 1.65)                  | 1.55 (1.44 to 1.64)                  | 1.65 (1.25 to 1.84)                   | ns                                    |
| Duodenum       | 1.42 (0.82 to 1.99)                  | 2.02 (1.59 to 2.42)                  | 1.55 (1.29 to 2.03)                   | ns                                    |
| Ileum          | 2.11 (2.06 to 2.49)                  | 2.42 (2.09 to 2.83)                  | 1.64 (1.32 to 2.52)                   | ns                                    |
| Colon          | 1.38 (1.18 to 1.49)                  | 1.88 (1.53 to 2.50)                  | 1.56 (1.23 to 1.68)                   | ns                                    |
| Adipose tissue | 4.36 (2.87 to 5.56)                  | 4.46 (3.37 to 5.98)                  | 3.10 (2.05 to 4.35)                   | ns                                    |
| Muscle         | 0.40 (0.30 to 0.65)                  | 0.66 (0.60 to 1.13)                  | 0.67 (0.58 to 1.41)                   | 0.032                                 |
| Brain          | 0.15 (0.13 to 0.17)                  | 0.19 (0.17 to 0.23)                  | 0.26 (0.22 to 0.39)                   | < 0.001                               |
| Skin           | 1.40 (0.67 to 2.04)                  | 1.81 (1.40 to 2.23)                  | 1.65 (1.40 to 2.78)                   | ns                                    |
| Bone           | 5.00 (4.22 to 6.62)                  | 4.09 (3.39 to 4.70)                  | 3.75 (3.33 to 4.67)                   | ns                                    |
| Bone marrow    | 5.25 (4.25 to 6.05)                  | 6.44 (6.22 to 7.96)                  | 8.16 (7.79 to 9.43)                   | ns                                    |
| Tumor          | 8.76 (8.31 to 12.31)                 | 10.59 (9.66 to 11.95)                | 9.52 (9.28 to 9.96)                   | ns                                    |

3  
 4 Data is presented as median % ID/g values with interquartile range from 10 µg <sup>89</sup>Zr-MSLN  
 5 HLE BiTE (n = 6), 50 µg <sup>89</sup>Zr-MSLN HLE BiTE (n = 6) and 200 µg <sup>89</sup>Zr-MSLN HLE BiTE  
 6 (n = 5). An analysis of variance was performed with the Kruskal-Wallis test, *P*-values <  
 7 0.05 are shown. LN = lymph node, ns= non-significant.

8

1 **Supplemental Table 2.** *Ex vivo* biodistribution data of 50 µg <sup>89</sup>Zr-MSLN HLE BiTE (n = 6)  
 2 and 50 µg <sup>89</sup>Zr-control HLE BiTE (n = 6) 5 days after tracer injection in 4T1-tumor bearing  
 3 syngeneic mice.

| Tissue         | 50 µg <sup>89</sup> Zr-MSLN HLE BiTE | 50 µg <sup>89</sup> Zr-control HLE BiTE | Mann-Whitney P |
|----------------|--------------------------------------|-----------------------------------------|----------------|
| Blood          | 4.56 (4.17 to 5.83)                  | 5.33 (4.78 to 6.06)                     | ns             |
| Plasma         | 7.96 (7.56 to 8.21)                  | 10.30 (7.89 to 11.80)                   | ns             |
| Heart          | 3.73 (3.34 to 3.96)                  | 1.81 (1.58 to 2.51)                     | 0.002          |
| Lung           | 10.11 (8.78 to 12.28)                | 3.24 (2.74 to 4.48)                     | 0.002          |
| Liver          | 7.77 (6.92 to 8.28)                  | 4.40 (3.94 to 4.65)                     | 0.002          |
| Kidney         | 7.80 (6.94 to 8.21)                  | 4.62 (4.27 to 6.10)                     | 0.004          |
| Pancreas       | 2.88 (2.30 to 3.65)                  | 0.71 (0.41 to 1.19)                     | 0.002          |
| Spleen         | 8.83 (5.95 to 12.17)                 | 2.47 (2.15 to 2.62)                     | 0.002          |
| Thymus         | 40.78 (36.15 to 65.11)               | 1.68 (1.30 to 2.15)                     | 0.002          |
| Mesenteric LNs | 22.57 (20.58 to 24.67)               | 1.66 (1.29 to 1.82)                     | 0.002          |
| Stomach        | 1.55 (1.44 to 1.64)                  | 1.05 (0.97 to 1.21)                     | 0.002          |
| Duodenum       | 2.02 (1.59 to 2.42)                  | 0.83 (0.64 to 0.98)                     | 0.002          |
| Ileum          | 2.42 (2.09 to 2.83)                  | 0.86 (0.70 to 0.94)                     | 0.002          |
| Colon          | 1.88 (1.53 to 2.50)                  | 0.76 (0.48 to 0.79)                     | 0.002          |
| Adipose tissue | 4.46 (3.37 to 5.98)                  | 0.86 (0.65 to 3.13)                     | 0.002          |
| Muscle         | 0.66 (0.60 to 1.13)                  | 0.75 (0.70 to 1.41)                     | ns             |
| Brain          | 0.19 (0.17 to 0.23)                  | 0.13 (0.13 to 0.19)                     | 0.015          |
| Skin           | 1.81 (1.40 to 2.23)                  | 2.01 (1.29 to 2.17)                     | ns             |
| Bone           | 4.09 (3.39 to 4.70)                  | 2.78 (2.60 to 4.21)                     | ns             |
| Bone marrow    | 6.44 (6.22 to 7.96)                  | 9.03 (6.53 to 9.43)                     | ns             |
| Tumor          | 10.59 (9.66 to 11.95)                | 4.68 (4.42 to 5.30)                     | 0.002          |

4  
 5 Data is presented as median % ID/g values with interquartile range. *P*-values < 0.05 from  
 6 the Mann-Whitney U-test are shown. LN = lymph node, ns= non-significant.

7
